# Supplementary material for: Evaluation of splanchnic oximetry, Doppler flow velocimetry in the superior mesenteric artery and feeding tolerance in very low birth weight IUGR and non-IUGR infants receiving bolus versus continuous enteral nutrition
Source: PubMed Central journal article supplement (PMC3447641; doi:10.1186/1471-2431-12-106), 2012-07-24
Supplement: 1471-2431-12-106-S1.pdf [file 1471-2431-12-106-S1.pdf]

## REGISTRATION

ID:  Last name initials:  First name initials:  Gender:  M  F

Date of birth:  g Race:  CODES: 1=Mediterranean Europe; 2=Central Europe; 3=Eastern Europe; 4=North Africa; 5=South Africa; 6=Central Africa; 7=Middle East; 8=Far East; 9=North America; 10=Central America; 11=South America

## ELIGIBILITY AT BIRTH

### Inclusion criteria:

Was consent obtained?  CODES: 1=YES; 2=NO

Weight at birth  g GA  w w d

### Exclusion criteria (see protocol for definitions):

Major congenital abnormality?  MOF?  CODES (for both): 1=YES; 2=NO; 9=NK

Pre-existing cutaneous disease?  CODES: 1=YES; 2=NO

Is the patient eligible according to protocol?  CODES: 1=YES; 2=NO; 6=Not evaluable; 9=NK

## STRATIFICATION

IUGR:  CODES: 1=YES; 2=NO

## RANDOMIZATION

Date of achievement of 100 ml/kg/day  d d m m y y

Ventilation at achievement of 100 ml/kg/day  CODES: 1=NO n-cPAP; 2=n-cPAP< 50%; 3= n-cPAP ≥ 50%; 4= Intubation

Do you plan to randomize?  CODES: 1=YES; 2=NO

IF **YES**: Date of randomization  d d m m y y

Random assigned  CODES: 1=Bolus+continuous; 2=Continuous+bolus

Random administered  CODES: 1=Bolus+continuous; 2=Continuous+bolus

If random administered is different from random assigned, specify reason  CODES: 1=Clinical decision; 2=Parents' refusal of consent; 3=Error; 4=Other; 9=Not known

If Other, specify: \_\_\_\_\_

IF **NO**: Cause of NO RANDOM  CODES: 1=No achievement of 100ml/kg/day; 2=Intubation or n-cPAP ≥ 50%; 3=NEC; 4=Transfer to other institution; 5=Parents' refusal of consent; 6=Error; 7=Other; 8=Death; 9=Not known

If Other, specify: \_\_\_\_\_

ID: Last name initials: First name initials: 

## BEFORE BIRTH

**Mother:** CODES (FOR ALL) : 1=YES; 2=NO; 9=NKPROM  Pre eclampsia  Chorionamnionitis  Placental abruption Antibiothic therapy  Indomethacin  Antepartum steroids **Fetus:**Doppler  CODES : 1=Normal; 2=Pathological; 3=Absent; 4=Reverse; 9=Not known

## AT BIRTH

Type of delivery  CODES: 1=PE; 2=TC funicular pH  IA 5' 

## AFTER BIRTH

Heart US  Cerebral US  Abdominal US  CODES (FOR ALL) : 1=Normal; 2=Pathological; 9= Not doneUAC  CODES: 1=YES; 2=NO**IF YES:** Date of placement  Date of removal   
d d m m y y d d m m y y**Nutrition:**UVC  CODES: 1=YES; 2=NO**IF YES:** 1<sup>st</sup> placem. Date of placement  Date of removal   
d d m m y y d d m m y yCVC  CODES: 1=YES; 2=NO**IF YES:** 1<sup>st</sup> placem. Date of placement  Date of removal   
d d m m y y d d m m y y2<sup>nd</sup> placem. Date of placement  Date of removal   
d d m m y y d d m m y yTPN 1<sup>st</sup> episode Date of start  Date of end   
d d m m y y d d m m y y2<sup>nd</sup> episode Date of start  Date of end   
d d m m y y d d m m y y\_\_\_\_\_  
Name of physician\_\_\_\_\_  
Date (dd-mm-yy)\_\_\_\_\_  
Signature of physician

ID:      

 Last name initials:   

 First name initials:   

### OXIMETRY AND PERFUSION

|                              |                         | 0-24 h                                                                  | 48-72 h                                            | MEF<br>12 ml/kg                                    | AT RANDOMIZED FEEDS*<br>100 ml/kg                  |                                            |                                            |                                            |                              |
|------------------------------|-------------------------|-------------------------------------------------------------------------|----------------------------------------------------|----------------------------------------------------|----------------------------------------------------|--------------------------------------------|--------------------------------------------|--------------------------------------------|------------------------------|
| DATE                         |                         | <input type="text"/><br><small>d d m m y y</small>                      | <input type="text"/><br><small>d d m m y y</small> | <input type="text"/><br><small>d d m m y y</small> | <input type="text"/><br><small>d d m m y y</small> |                                            |                                            |                                            |                              |
| Type of milk                 |                         | CODES: 1=Human Milk; 2=Fortified Human Milk<br>3=Preterm Formula; 4=PDF |                                                    | <input type="text"/>                               | <input type="text"/>                               |                                            |                                            |                                            |                              |
|                              |                         |                                                                         |                                                    |                                                    | BOLUS                                              |                                            | CONTINUOUS                                 |                                            |                              |
| Start of feed                |                         |                                                                         |                                                    |                                                    | <input type="text"/><br><small>h h</small>         | <input type="text"/><br><small>m m</small> | <input type="text"/><br><small>h h</small> | <input type="text"/><br><small>m m</small> |                              |
|                              |                         |                                                                         |                                                    |                                                    | <small>B<sub>0</sub></small>                       | <small>B<sub>1</sub></small>               | <small>C<sub>0</sub></small>               | <small>C<sub>1</sub></small>               | <small>C<sub>2</sub></small> |
|                              |                         |                                                                         |                                                    |                                                    | <small>- 30'</small>                               | <small>+ 30'</small>                       | <small>- 30'</small>                       | <small>+ 30'</small>                       | <small>+ 3h</small>          |
| NIRS                         | SatO <sub>2</sub><br>%  |                                                                         |                                                    |                                                    |                                                    |                                            |                                            |                                            |                              |
|                              | rSO <sub>2</sub> C<br>% |                                                                         |                                                    |                                                    |                                                    |                                            |                                            |                                            |                              |
|                              | TOI C<br>%              |                                                                         |                                                    |                                                    |                                                    |                                            |                                            |                                            |                              |
|                              | rSO <sub>2</sub> S<br>% |                                                                         |                                                    |                                                    |                                                    |                                            |                                            |                                            |                              |
|                              | TOI S<br>%              |                                                                         |                                                    |                                                    |                                                    |                                            |                                            |                                            |                              |
|                              | CSOR<br>N               |                                                                         |                                                    |                                                    |                                                    |                                            |                                            |                                            |                              |
| ECO                          | PSV<br>cm/sec           |                                                                         |                                                    |                                                    |                                                    |                                            |                                            |                                            |                              |
|                              | EDV<br>cm/sec           |                                                                         |                                                    |                                                    |                                                    |                                            |                                            |                                            |                              |
|                              | Vmean<br>cm/sec         |                                                                         |                                                    |                                                    |                                                    |                                            |                                            |                                            |                              |
|                              | IR<br>N                 |                                                                         |                                                    |                                                    |                                                    |                                            |                                            |                                            |                              |
| Capillar<br>Hemoglobine g/dL |                         |                                                                         |                                                    |                                                    |                                                    |                                            |                                            |                                            |                              |

\*enter data in cells below, irrespective of the randomized order in which feeds were given.

 \_\_\_\_\_  
 Name of physician

 \_\_\_\_\_  
 Date (dd-mm-yy)

 \_\_\_\_\_  
 Signature of physician

# SPLANCHNIC OXIMETRY IN VLBW

No.4

ID:

Last name initials:

First name initials:

## GROWTH

|                           | At birth                                                                              | MEF                                                                                   | At achievement of 100 ml/kg/day                                                       | At randomized feeds                                                                   |
|---------------------------|---------------------------------------------------------------------------------------|---------------------------------------------------------------------------------------|---------------------------------------------------------------------------------------|---------------------------------------------------------------------------------------|
| <b>WEIGHT</b>             | <input type="text"/> <input type="text"/> <input type="text"/> <input type="text"/> g | <input type="text"/> <input type="text"/> <input type="text"/> <input type="text"/> g | <input type="text"/> <input type="text"/> <input type="text"/> <input type="text"/> g | <input type="text"/> <input type="text"/> <input type="text"/> <input type="text"/> g |
| <b>LENGTH</b>             | <input type="text"/> <input type="text"/> cm                                          | <input type="text"/> <input type="text"/> cm                                          | <input type="text"/> <input type="text"/> cm                                          | <input type="text"/> <input type="text"/> cm                                          |
| <b>HEAD CIRCUMFERENCE</b> | <input type="text"/> <input type="text"/> cm                                          | <input type="text"/> <input type="text"/> cm                                          | <input type="text"/> <input type="text"/> cm                                          | <input type="text"/> <input type="text"/> cm                                          |
| <b>TYPE OF MILK</b>       | CODES: 1=Human Milk; 2=Fortified Human Milk<br>3=Preterm Formula; 4=PDF               |                                                                                       | <input type="text"/>                                                                  |                                                                                       |

|                                              | At full enteral feeding                                                                                                                      | At 28 days of age                                                                                                                            |
|----------------------------------------------|----------------------------------------------------------------------------------------------------------------------------------------------|----------------------------------------------------------------------------------------------------------------------------------------------|
| <b>DATE</b>                                  | <input type="text"/> <input type="text"/> <input type="text"/> <input type="text"/> <input type="text"/> <input type="text"/><br>d d m m y y | <input type="text"/> <input type="text"/> <input type="text"/> <input type="text"/> <input type="text"/> <input type="text"/><br>d d m m y y |
| <b>WEIGHT</b>                                | <input type="text"/> <input type="text"/> <input type="text"/> <input type="text"/> g                                                        | <input type="text"/> <input type="text"/> <input type="text"/> <input type="text"/> g                                                        |
| <b>LENGTH</b>                                | <input type="text"/> <input type="text"/> cm                                                                                                 | <input type="text"/> <input type="text"/> cm                                                                                                 |
| <b>HEAD CIRCUMFERENCE</b>                    | <input type="text"/> <input type="text"/> cm                                                                                                 | <input type="text"/> <input type="text"/> cm                                                                                                 |
| <b>TYPE OF MILK</b><br>(see above for CODES) | <input type="text"/>                                                                                                                         | <input type="text"/>                                                                                                                         |

\_\_\_\_\_  
Name of physician

\_\_\_\_\_  
Date (dd-mm-yy)

\_\_\_\_\_  
Signature of physician

ID:      

 Last name initials:   

 First name initials:   

## MORBILITIES

CODES (for all, if not otherwise stated): 1=YES; 2=NO; 9=NK

 PDA :  **IF YES:** 1<sup>st</sup> episode Date of diagnosis        
d d m m y y Date of recovery        
d d m m y y

 2<sup>nd</sup> episode Date of diagnosis        
d d m m y y Date of recovery        
d d m m y y

 Medical treatment  Surgical treatment 

 Clinical sepsis  **IF YES:** 1<sup>st</sup> episode Date of diagnosis        
d d m m y y Date of recovery        
d d m m y y

 2<sup>nd</sup> episode Date of diagnosis        
d d m m y y Date of recovery        
d d m m y y

 IVH:  CODES: 1=I grade; 2=II grade; 3=III grade; 4=III grade plus; 5=NO Date of diagnosis        
d d m m y y

 PVL :  CODES: 1=I grade; 2=II grade; 3=III grade; 4=NO Date of diagnosis        
d d m m y y

 RDS :  CODES: 1=I grade; 2=II grade; 3=III grade; 4=NO

 Surfactant :  BPD : 

 c-PAP :  **IF YES:** 1<sup>st</sup> episode Start date        
d d m m y y End date        
d d m m y y

 2<sup>nd</sup> episode Start date        
d d m m y y End date        
d d m m y y

 3<sup>rd</sup> episode Start date        
d d m m y y End date        
d d m m y y

 Intubation :  **IF YES:** 1<sup>st</sup> episode Start date        
d d m m y y End date        
d d m m y y

 2<sup>nd</sup> episode Start date        
d d m m y y End date        
d d m m y y

 FiO<sub>2</sub> >40% :  **IF YES:** 1<sup>st</sup> episode Start date        
d d m m y y End date        
d d m m y y

 2<sup>nd</sup> episode Start date        
d d m m y y End date        
d d m m y y

 3<sup>rd</sup> episode Start date        
d d m m y y End date        
d d m m y y

 NEC :  **IF YES:** 1<sup>st</sup> episode Date of diagnosis        
d d m m y y Date of recovery        
d d m m y y

(diagnosed within 30 days)

 2<sup>nd</sup> episode Date of diagnosis        
d d m m y y Date of recovery        
d d m m y y

Name of physician

Date (dd-mm-yy)

Signature of physician
